# Supplementary material for: Near-infrared luminescence and SMM behaviors of a family of dinuclear lanthanide 8-quinolinolate complexes
Source: Royal Society of Chemistry journal article supplement (doi:10.1039/c6ra02656g), 2016-01-01
Supplement: c6ra02656g1.pdf [file c6ra02656g1.pdf]

*Electronic supplementary information*

Near-infrared luminescence and SMM behaviors of a family of  
dinuclear lanthanide 8-quinolinolate complexes

Hai-Yun Shen, Wen-Min Wang, Hong-Ling Gao, Jian-Zhong Cui\*

*Department of Chemistry, Tianjin University, Tianjin 300072, P. R. China.*

\*Corresponding author. E-mail address: cuijianzhong@tju.edu.cn

**List of Contents**

**Supplementary Experimental Section**

**Table S1–S5** Selected bond lengths (Å) and angles (°) for complexes **1–5**.

**Fig. S1-S3** PXRD patterns of complexes **1–5**.

**Fig. S4** UV-vis absorption spectra of complexes **1–5** in the solid state at room temperature.

**Fig. S5** Excitation spectra of complex **1** ( $\lambda_{em} = 1060$  nm) in the solid-state.

**Fig. S6** Luminescence decay of complex **1** in solid state at room temperature. Red trace is a fit to a single exponential decay function.

**Fig. S7** Temperature dependence of the out-of-phase component of ac susceptibility for **2** in zero dc field with an oscillating of 3 Oe.

### Supplementary Experimental Section.

**Preparations of Ln(dbm)<sub>3</sub>·2H<sub>2</sub>O (Ln = Nd, Tb, Dy, Ho, Er).** Ln(dbm)<sub>3</sub>·2H<sub>2</sub>O has been synthesized by the method reported [1] with some modifications. A solution of dibenzoylmethane (4 mmol) in ethanol (20 mL) was warmed (60 °C). The lanthanide acetate (12 mmol) was dissolved in distilled water (10 mL) and added drop-wise to the above solution. The mixture was heated for 4 h at approximately 60 °C and then cooled to room temperature. The precipitate was filtered, washed with water and dried under vacuum to afford the product.

[1] A. Lennartson, M. Vestergren and M. Håkansson, *Chem.–Eur. J.*, 2005, **11**, 1757.

**Table S1** Selected bond lengths (Å) and angles (°) for [Nd<sub>2</sub>(dbm)<sub>4</sub>(OQ)<sub>2</sub>(CH<sub>3</sub>OH)<sub>2</sub>] (**1**)

|                  |            |                   |           |
|------------------|------------|-------------------|-----------|
| Nd(1)–O(4)       | 2.387(2)   | Nd(2)–O(7)        | 2.382(2)  |
| Nd(1)–O(3)       | 2.388(2)   | Nd(2)–O(8)        | 2.389(2)  |
| Nd(1)–O(5)       | 2.421(2)   | Nd(2)–O(10)       | 2.419(2)  |
| Nd(1)–O(6)       | 2.437(2)   | Nd(2)–O(1)        | 2.430(2)  |
| Nd(1)–O(1)       | 2.449(2)   | Nd(2)–O(2)        | 2.449(2)  |
| Nd(1)–O(2)       | 2.461(2)   | Nd(2)–O(9)        | 2.471(2)  |
| Nd(1)–O(11)      | 2.533(3)   | Nd(2)–O(12)       | 2.537(3)  |
| Nd(1)–N(1)       | 2.593(3)   | Nd(2)–N(2)        | 2.580(3)  |
| Nd(1)–Nd(2)      | 4.0192(16) |                   |           |
| O(4)–Nd(1)–O(3)  | 71.29(9)   | O(7)–Nd(2)–O(10)  | 76.07(8)  |
| O(4)–Nd(1)–O(5)  | 76.48(8)   | O(8)–Nd(2)–O(10)  | 73.23(9)  |
| O(3)–Nd(1)–O(5)  | 73.53(9)   | O(7)–Nd(2)–O(1)   | 85.11(8)  |
| O(4)–Nd(1)–O(6)  | 84.34(9)   | O(8)–Nd(2)–O(1)   | 124.33(8) |
| O(3)–Nd(1)–O(6)  | 139.78(8)  | O(10)–Nd(2)–O(1)  | 149.00(8) |
| O(5)–Nd(1)–O(6)  | 69.87(8)   | O(7)–Nd(2)–O(2)   | 147.27(8) |
| O(4)–Nd(1)–O(1)  | 152.91(8)  | O(8)–Nd(2)–O(2)   | 139.14(8) |
| O(3)–Nd(1)–O(1)  | 134.27(8)  | O(10)–Nd(2)–O(2)  | 115.52(8) |
| O(5)–Nd(1)–O(1)  | 115.47(8)  | O(1)–Nd(2)–O(2)   | 69.85(8)  |
| O(6)–Nd(1)–O(1)  | 78.08(8)   | O(7)–Nd(2)–O(9)   | 79.72(9)  |
| O(4)–Nd(1)–O(2)  | 87.34(8)   | O(8)–Nd(2)–O(9)   | 137.79(8) |
| O(3)–Nd(1)–O(2)  | 129.11(8)  | O(10)–Nd(2)–O(9)  | 69.58(8)  |
| O(5)–Nd(1)–O(2)  | 146.17(8)  | O(1)–Nd(2)–O(9)   | 83.11(8)  |
| O(6)–Nd(1)–O(2)  | 79.22(8)   | O(2)–Nd(2)–O(9)   | 76.74(8)  |
| O(1)–Nd(1)–O(2)  | 69.34(8)   | O(7)–Nd(2)–O(12)  | 113.38(9) |
| O(4)–Nd(1)–O(11) | 106.09(9)  | O(8)–Nd(2)–O(12)  | 71.54(8)  |
| O(3)–Nd(1)–O(11) | 70.57(8)   | O(10)–Nd(2)–O(12) | 138.02(8) |
| O(5)–Nd(1)–O(11) | 140.65(8)  | O(1)–Nd(2)–O(12)  | 72.16(8)  |
| O(6)–Nd(1)–O(11) | 148.86(8)  | O(2)–Nd(2)–O(12)  | 79.39(8)  |
| O(1)–Nd(1)–O(11) | 80.43(8)   | O(9)–Nd(2)–O(12)  | 150.29(8) |
| O(2)–Nd(1)–O(11) | 72.22(8)   | O(7)–Nd(2)–N(2)   | 144.68(9) |
| O(4)–Nd(1)–N(1)  | 140.88(9)  | O(8)–Nd(2)–N(2)   | 81.42(9)  |
| O(3)–Nd(1)–N(1)  | 78.23(9)   | O(10)–Nd(2)–N(2)  | 73.80(9)  |
| O(5)–Nd(1)–N(1)  | 71.71(8)   | O(1)–Nd(2)–N(2)   | 129.87(8) |
| O(6)–Nd(1)–N(1)  | 104.96(9)  | O(2)–Nd(2)–N(2)   | 65.06(9)  |
| O(1)–Nd(1)–N(1)  | 64.68(8)   | O(9)–Nd(2)–N(2)   | 106.10(9) |
| O(2)–Nd(1)–N(1)  | 131.49(8)  | O(12)–Nd(2)–N(2)  | 79.04(9)  |
| O(11)–Nd(1)–N(1) | 85.57(9)   | O(7)–Nd(2)–Nd(1)  | 116.98(6) |
| O(4)–Nd(1)–Nd(2) | 121.32(6)  | O(8)–Nd(2)–Nd(1)  | 144.16(6) |
| O(3)–Nd(1)–Nd(2) | 143.30(6)  | O(10)–Nd(2)–Nd(1) | 141.39(6) |
| O(5)–Nd(1)–Nd(2) | 140.40(6)  | O(1)–Nd(2)–Nd(1)  | 34.70(5)  |
| O(6)–Nd(1)–Nd(2) | 76.78(6)   | O(2)–Nd(2)–Nd(1)  | 35.16(5)  |
| O(1)–Nd(1)–Nd(2) | 34.39(5)   | O(9)–Nd(2)–Nd(1)  | 77.09(6)  |
| O(2)–Nd(1)–Nd(2) | 34.96(6)   | O(12)–Nd(2)–Nd(1) | 73.20(6)  |

|                   |          |                  |           |
|-------------------|----------|------------------|-----------|
| O(11)–Nd(1)–Nd(2) | 72.75(6) | N(2)–Nd(2)–Nd(1) | 98.13(7)  |
| N(1)–Nd(1)–Nd(2)  | 97.78(7) | Nd(2)–O(1)–Nd(1) | 110.91(9) |
| O(7)–Nd(2)–O(8)   | 72.54(8) | Nd(2)–O(2)–Nd(1) | 109.88(9) |

**Table S2** Selected bond lengths (Å) and angles (°) for [Tb<sub>2</sub>(dbm)<sub>4</sub>(OQ)<sub>2</sub>(CH<sub>3</sub>OH)<sub>2</sub>] (**2**)

|                   |           |                      |            |
|-------------------|-----------|----------------------|------------|
| Tb(1)–O(5)        | 2.314(2)  | Tb(1)–O(2)           | 2.389(2)   |
| Tb(1)–O(4)        | 2.324(3)  | Tb(1)–O(6)           | 2.443(2)   |
| Tb(1)–O(3)        | 2.361(2)  | Tb(1)–N(1)#1         | 2.526(3)   |
| Tb(1)–O(1)#1      | 2.377(2)  | Tb(1)–Tb(1)#1        | 3.940(2)   |
| Tb(1)–O(1)        | 2.384(2)  |                      |            |
| O(5)–Tb(1)–O(4)   | 73.73(9)  | O(1)–Tb(1)–O(6)      | 72.67(9)   |
| O(5)–Tb(1)–O(3)   | 77.81(9)  | O(2)–Tb(1)–O(6)      | 149.38(8)  |
| O(4)–Tb(1)–O(3)   | 72.63(9)  | O(5)–Tb(1)–N(1)#1    | 144.82(9)  |
| O(5)–Tb(1)–O(1)#1 | 146.45(8) | O(4)–Tb(1)–N(1)#1    | 79.37(10)  |
| O(4)–Tb(1)–O(1)#1 | 138.58(8) | O(3)–Tb(1)–N(1)#1    | 72.76(9)   |
| O(3)–Tb(1)–O(1)#1 | 115.47(8) | O(1)#1–Tb(1)–N(1)#1  | 66.36(9)   |
| O(5)–Tb(1)–O(1)   | 84.31(9)  | O(1)–Tb(1)–N(1)#1    | 130.61(8)  |
| O(4)–Tb(1)–O(1)   | 127.74(9) | O(2)–Tb(1)–N(1)#1    | 107.55(10) |
| O(3)–Tb(1)–O(1)   | 147.51(8) | O(6)–Tb(1)–N(1)#1    | 82.22(10)  |
| O(1)#1–Tb(1)–O(1) | 68.31(10) | O(5)–Tb(1)–Tb(1)#1   | 116.29(7)  |
| O(5)–Tb(1)–O(2)   | 79.79(9)  | O(4)–Tb(1)–Tb(1)#1   | 145.37(6)  |
| O(4)–Tb(1)–O(2)   | 138.44(8) | O(3)–Tb(1)–Tb(1)#1   | 140.33(6)  |
| O(3)–Tb(1)–O(2)   | 70.85(9)  | O(1)#1–Tb(1)–Tb(1)#1 | 34.21(6)   |
| O(1)#1–Tb(1)–O(2) | 76.55(8)  | O(1)–Tb(1)–Tb(1)#1   | 34.10(6)   |
| O(1)–Tb(1)–O(2)   | 79.48(9)  | O(2)–Tb(1)–Tb(1)#1   | 75.48(6)   |
| O(5)–Tb(1)–O(6)   | 109.26(9) | O(6)–Tb(1)–Tb(1)#1   | 74.36(6)   |
| O(4)–Tb(1)–O(6)   | 71.11(9)  | N(1)#1–Tb(1)–Tb(1)#1 | 98.74(7)   |
| O(3)–Tb(1)–O(6)   | 138.95(9) | Tb(1)#1–O(1)–Tb(1)   | 111.69(10) |
| O(1)#1–Tb(1)–O(6) | 81.48(8)  |                      |            |

The symmetry code: #1 -x+1,-y+1,-z+1

**Table S3** Selected bond lengths (Å) and angles (°) for [Dy<sub>2</sub>(dbm)<sub>4</sub>(OQ)<sub>2</sub>(CH<sub>3</sub>OH)<sub>2</sub>] (**3**)

|                   |            |                   |            |
|-------------------|------------|-------------------|------------|
| Dy(1)–O(5)        | 2.298(3)   | Dy(1)–O(2)        | 2.376(3)   |
| Dy(1)–O(4)        | 2.307(3)   | Dy(1)–O(6)        | 2.430(3)   |
| Dy(1)–O(1)        | 2.361(2)   | Dy(1)–N(1)        | 2.510(3)   |
| Dy(1)–O(3)        | 2.362(3)   | Dy(1)–Dy(1)#1     | 3.908(2)   |
| Dy(1)–O(1)#1      | 2.368(3)   |                   |            |
| O(5)–Dy(1)–O(4)   | 73.78(10)  | O(1)#1–Dy(1)–O(6) | 72.55(10)  |
| O(5)–Dy(1)–O(1)   | 145.91(10) | O(2)–Dy(1)–O(6)   | 149.60(9)  |
| O(4)–Dy(1)–O(1)   | 139.00(10) | O(5)–Dy(1)–N(1)   | 145.13(10) |
| O(5)–Dy(1)–O(3)   | 78.31(10)  | O(4)–Dy(1)–N(1)   | 79.58(11)  |
| O(4)–Dy(1)–O(3)   | 72.79(10)  | O(1)–Dy(1)–N(1)   | 66.62(10)  |
| O(1)–Dy(1)–O(3)   | 115.32(9)  | O(3)–Dy(1)–N(1)   | 72.53(10)  |
| O(5)–Dy(1)–O(1)#1 | 83.62(9)   | O(1)#1–Dy(1)–N(1) | 130.97(9)  |

|                   |            |                      |            |
|-------------------|------------|----------------------|------------|
| O(4)–Dy(1)–O(1)#1 | 127.17(10) | O(2)–Dy(1)–N(1)      | 107.54(11) |
| O(1)–Dy(1)–O(1)#1 | 68.55(10)  | O(6)–Dy(1)–N(1)      | 82.58(11)  |
| O(3)–Dy(1)–O(1)#1 | 147.63(10) | O(5)–Dy(1)–Dy(1)#1   | 115.66(7)  |
| O(5)–Dy(1)–O(2)   | 79.69(10)  | O(4)–Dy(1)–Dy(1)#1   | 145.30(7)  |
| O(4)–Dy(1)–O(2)   | 138.40(9)  | O(1)–Dy(1)–Dy(1)#1   | 34.33(6)   |
| O(1)–Dy(1)–O(2)   | 76.37(9)   | O(3)–Dy(1)–Dy(1)#1   | 140.37(7)  |
| O(3)–Dy(1)–O(2)   | 70.85(10)  | O(1)#1–Dy(1)–Dy(1)#1 | 34.22(6)   |
| O(1)#1–Dy(1)–O(2) | 79.69(9)   | O(2)–Dy(1)–Dy(1)#1   | 75.47(7)   |
| O(5)–Dy(1)–O(6)   | 108.68(10) | O(6)–Dy(1)–Dy(1)#1   | 74.64(7)   |
| O(4)–Dy(1)–O(6)   | 70.79(10)  | N(1)–Dy(1)–Dy(1)#1   | 99.06(8)   |
| O(1)–Dy(1)–O(6)   | 82.08(9)   | Dy(1)–O(1)–Dy(1)#1   | 111.45(10) |
| O(3)–Dy(1)–O(6)   | 138.84(10) |                      |            |

The symmetry code: #1 -x+1,-y+1,-z+1

**Table S4** Selected bond lengths (Å) and angles (°) for [Ho<sub>2</sub>(dbm)<sub>4</sub>(OQ)<sub>2</sub>(CH<sub>3</sub>OH)<sub>2</sub>] (4)

|                   |            |                      |            |
|-------------------|------------|----------------------|------------|
| Ho(1)–O(5)        | 2.294(3)   | Ho(1)–O(2)           | 2.368(3)   |
| Ho(1)–O(4)        | 2.304(3)   | Ho(1)–O(6)           | 2.410(3)   |
| Ho(1)–O(3)        | 2.350(3)   | Ho(1)–N(1)           | 2.495(4)   |
| Ho(1)–O(1)#1      | 2.356(3)   | Ho(1)–Ho(1)#1        | 3.903(2)   |
| Ho(1)–O(1)        | 2.358(3)   |                      |            |
| O(5)–Ho(1)–O(4)   | 74.15(11)  | O(1)–Ho(1)–O(6)      | 82.06(10)  |
| O(5)–Ho(1)–O(3)   | 78.48(11)  | O(2)–Ho(1)–O(6)      | 149.80(11) |
| O(4)–Ho(1)–O(3)   | 72.68(11)  | O(5)–Ho(1)–N(1)      | 145.39(11) |
| O(5)–Ho(1)–O(1)#1 | 83.44(10)  | O(4)–Ho(1)–N(1)      | 79.58(12)  |
| O(4)–Ho(1)–O(1)#1 | 127.20(11) | O(3)–Ho(1)–N(1)      | 72.40(11)  |
| O(3)–Ho(1)–O(1)#1 | 147.82(10) | O(1)#1–Ho(1)–N(1)    | 130.91(11) |
| O(5)–Ho(1)–O(1)   | 145.34(10) | O(1)–Ho(1)–N(1)      | 66.87(11)  |
| O(4)–Ho(1)–O(1)   | 139.14(10) | O(2)–Ho(1)–N(1)      | 107.47(12) |
| O(3)–Ho(1)–O(1)   | 115.54(10) | O(6)–Ho(1)–N(1)      | 82.36(12)  |
| O(1)#1–Ho(1)–O(1) | 68.23(11)  | O(5)–Ho(1)–Ho(1)#1   | 115.33(8)  |
| O(5)–Ho(1)–O(2)   | 79.45(11)  | O(4)–Ho(1)–Ho(1)#1   | 145.27(8)  |
| O(4)–Ho(1)–O(2)   | 138.47(10) | O(3)–Ho(1)–Ho(1)#1   | 140.49(8)  |
| O(3)–Ho(1)–O(2)   | 71.01(11)  | O(1)#1–Ho(1)–Ho(1)#1 | 34.13(7)   |
| O(1)#1–Ho(1)–O(2) | 79.70(10)  | O(1)–Ho(1)–Ho(1)#1   | 34.10(7)   |
| O(1)–Ho(1)–O(2)   | 76.26(10)  | O(2)–Ho(1)–Ho(1)#1   | 75.44(8)   |
| O(5)–Ho(1)–O(6)   | 108.97(11) | O(6)–Ho(1)–Ho(1)#1   | 74.81(8)   |
| O(4)–Ho(1)–O(6)   | 70.61(11)  | N(1)–Ho(1)–Ho(1)#1   | 99.10(9)   |
| O(3)–Ho(1)–O(6)   | 138.42(11) | Ho(1)#1–O(1)–Ho(1)   | 111.77(11) |
| O(1)#1–Ho(1)–O(6) | 72.81(11)  |                      |            |

The symmetry code: #1 -x+1,-y+1,-z+1

**Table S5** Selected bond lengths (Å) and angles (°) for [Er<sub>2</sub>(dbm)<sub>4</sub>(OQ)<sub>2</sub>(CH<sub>3</sub>OH)]·CH<sub>3</sub>COCH<sub>3</sub> (**5**)

|                   |            |                   |            |
|-------------------|------------|-------------------|------------|
| Er(1)–O(3)        | 2.240(3)   | Er(2)–O(8)        | 2.293(3)   |
| Er(1)–O(6)        | 2.248(3)   | Er(2)–O(7)        | 2.293(3)   |
| Er(1)–O(5)        | 2.269(3)   | Er(2)–O(9)        | 2.302(3)   |
| Er(1)–O(4)        | 2.282(4)   | Er(2)–O(1)        | 2.344(3)   |
| Er(1)–O(2)        | 2.282(3)   | Er(2)–O(2)        | 2.350(3)   |
| Er(1)–O(1)        | 2.309(3)   | Er(2)–O(10)       | 2.374(3)   |
| Er(1)–O(11)       | 2.360(3)   | Er(2)–N(2)        | 2.458(4)   |
| Er(1)–Er(2)       | 3.7889(9)  | Er(2)–N(1)        | 2.470(4)   |
| O(3)–Er(1)–O(6)   | 112.11(13) | O(9)–Er(2)–O(1)   | 114.37(12) |
| O(3)–Er(1)–O(5)   | 72.70(13)  | O(8)–Er(2)–O(2)   | 129.87(12) |
| O(6)–Er(1)–O(5)   | 73.59(12)  | O(7)–Er(2)–O(2)   | 75.20(12)  |
| O(3)–Er(1)–O(4)   | 73.55(13)  | O(9)–Er(2)–O(2)   | 142.14(12) |
| O(6)–Er(1)–O(4)   | 80.84(13)  | O(1)–Er(2)–O(2)   | 69.68(11)  |
| O(5)–Er(1)–O(4)   | 125.15(12) | O(8)–Er(2)–O(10)  | 130.91(12) |
| O(3)–Er(1)–O(2)   | 107.21(13) | O(7)–Er(2)–O(10)  | 147.78(12) |
| O(6)–Er(1)–O(2)   | 123.46(13) | O(9)–Er(2)–O(10)  | 70.96(12)  |
| O(5)–Er(1)–O(2)   | 81.46(12)  | O(1)–Er(2)–O(10)  | 82.00(12)  |
| O(4)–Er(1)–O(2)   | 150.27(12) | O(2)–Er(2)–O(10)  | 72.60(12)  |
| O(3)–Er(1)–O(1)   | 161.52(13) | O(8)–Er(2)–N(2)   | 76.46(14)  |
| O(6)–Er(1)–O(1)   | 82.13(12)  | O(7)–Er(2)–N(2)   | 93.07(13)  |
| O(5)–Er(1)–O(1)   | 124.23(12) | O(9)–Er(2)–N(2)   | 93.22(13)  |
| O(4)–Er(1)–O(1)   | 98.32(12)  | O(1)–Er(2)–N(2)   | 136.23(13) |
| O(2)–Er(1)–O(1)   | 71.48(11)  | O(2)–Er(2)–N(2)   | 67.92(13)  |
| O(3)–Er(1)–O(11)  | 80.19(13)  | O(10)–Er(2)–N(2)  | 75.61(13)  |
| O(6)–Er(1)–O(11)  | 150.90(12) | O(8)–Er(2)–N(1)   | 79.51(13)  |
| O(5)–Er(1)–O(11)  | 135.27(13) | O(7)–Er(2)–N(1)   | 83.82(13)  |
| O(4)–Er(1)–O(11)  | 77.63(13)  | O(9)–Er(2)–N(1)   | 74.85(13)  |
| O(2)–Er(1)–O(11)  | 73.36(12)  | O(1)–Er(2)–N(1)   | 67.89(13)  |
| O(1)–Er(1)–O(11)  | 81.86(12)  | O(2)–Er(2)–N(1)   | 133.47(12) |
| O(3)–Er(1)–Er(2)  | 140.59(10) | O(10)–Er(2)–N(1)  | 118.50(13) |
| O(6)–Er(1)–Er(2)  | 103.86(10) | N(2)–Er(2)–N(1)   | 155.58(14) |
| O(5)–Er(1)–Er(2)  | 103.82(9)  | O(8)–Er(2)–Er(1)  | 150.02(8)  |
| O(4)–Er(1)–Er(2)  | 129.37(9)  | O(7)–Er(2)–Er(1)  | 77.54(9)   |
| O(2)–Er(1)–Er(2)  | 35.72(8)   | O(9)–Er(2)–Er(1)  | 138.25(9)  |
| O(1)–Er(1)–Er(2)  | 35.79(8)   | O(1)–Er(2)–Er(1)  | 35.18(8)   |
| O(11)–Er(1)–Er(2) | 75.90(9)   | O(2)–Er(2)–Er(1)  | 34.54(8)   |
| O(8)–Er(2)–O(7)   | 72.68(12)  | O(10)–Er(2)–Er(1) | 75.62(8)   |
| O(8)–Er(2)–O(9)   | 71.23(12)  | N(2)–Er(2)–Er(1)  | 102.07(10) |
| O(7)–Er(2)–O(9)   | 140.69(12) | N(1)–Er(2)–Er(1)  | 100.88(10) |
| O(8)–Er(2)–O(1)   | 142.91(12) | Er(1)–O(1)–Er(2)  | 109.03(12) |
| O(7)–Er(2)–O(1)   | 86.27(12)  | Er(1)–O(2)–Er(2)  | 109.74(13) |

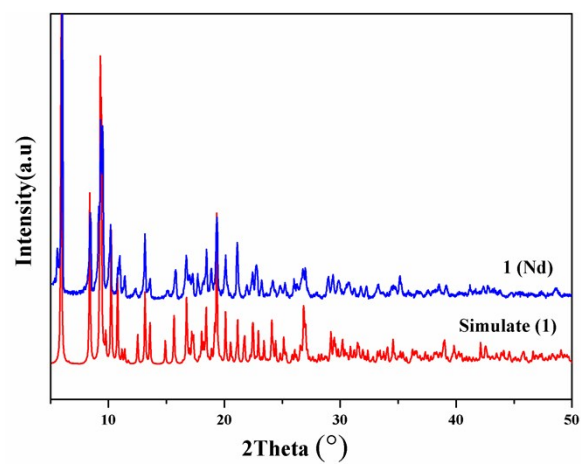

**Fig. S1** PXRD patterns of complex 1.

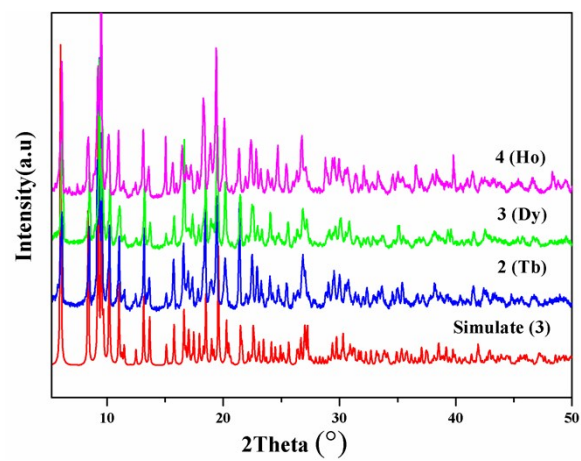

**Fig. S2** PXRD patterns of complexes 2–4.

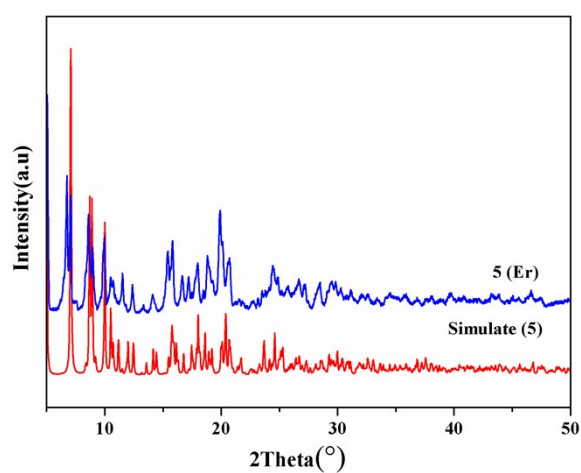

**Fig. S3** PXRD patterns of complex 5.

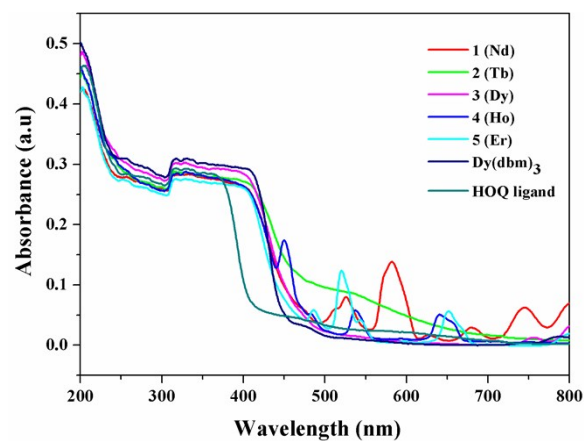

**Fig. S4** UV-vis absorption spectra of complexes **1–5** in the solid state at room temperature.

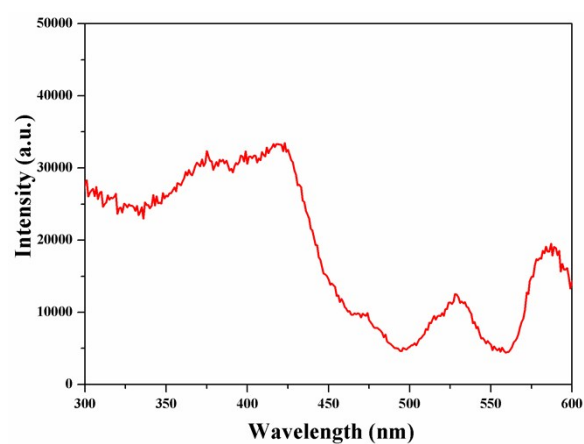

**Fig. S5** Excitation spectra of complex **1** ( $\lambda_{em} = 1060$  nm) in the solid-state.

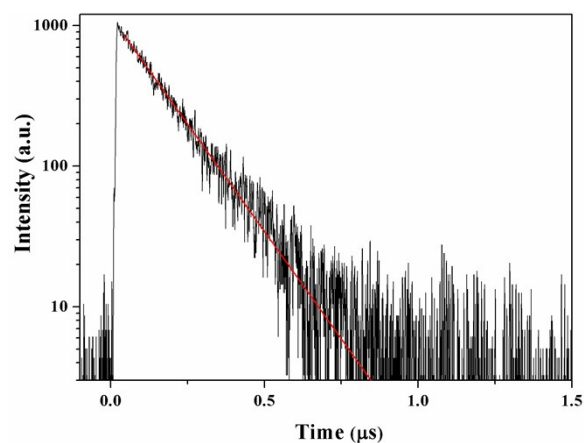

**Fig. S6** Luminescence decay of complex **1** in solid state at room temperature. Red trace is a fit to a single exponential decay function.



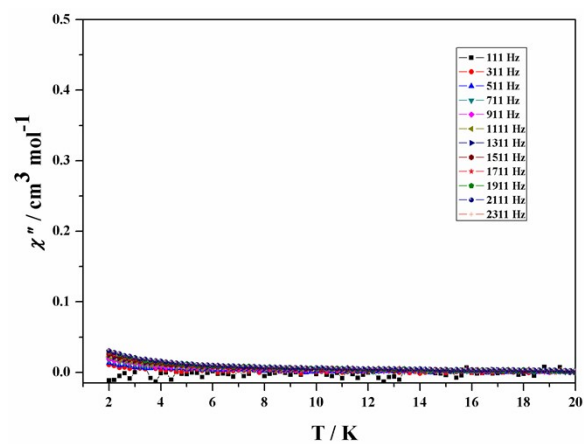

**Fig. S7** Temperature dependence of the out-of-phase component of ac susceptibility for **2** in zero dc field with an oscillating of 3 Oe.
